1 **Many rice genes are differentially spliced between roots and shoots but cytokinin has**  
2 **minimal effect on splicing**

3

4 Running title: Differential splicing in rice

5

6 Nowlan H. Freese<sup>1\*</sup>, April R. Estrada<sup>1\*</sup>, Ivory C. Blakley<sup>1</sup>, Jinjie Duan<sup>2</sup>, Ann E. Loraine<sup>1\*\*</sup>

7 <sup>1</sup>Department of Bioinformatics and Genomics, University of North Carolina at Charlotte,  
8 Charlotte, NC, USA

9 <sup>2</sup>Bioinformatics Research Center, Aarhus University, C.F. Moellers Alle 8, Aarhus C, Denmark.

10

11 \*Equal contribution.

12 \*\*Corresponding author.

13

14 Nowlan Freese: [nowlan.freese@gmail.com](mailto:nowlan.freese@gmail.com)

15 April R. Estrada: [april.estrada@duke-energy.com](mailto:april.estrada@duke-energy.com)

16 Ivory C. Blakley: [ieclabau@uncc.edu](mailto:ieclabau@uncc.edu)

17 Jinjie Duan: [jjduan.birc@gmail.com](mailto:jjduan.birc@gmail.com)

18 Ann E. Loraine: [ann.loraine@uncc.edu](mailto:ann.loraine@uncc.edu)

19 Corresponding author phone: 704-687-0144

20 **ABSTRACT**

21 Alternatively spliced genes produce multiple spliced isoforms, called transcript variants. In  
22 differential alternative splicing, transcript variant abundance differs across sample types.  
23 Differential alternative splicing is common in animal systems and influences cellular  
24 development in many processes, but its extent and significance is not as well known in plants. To  
25 investigate alternative splicing in plants, we examined RNA-Seq data from rice seedlings. The  
26 data included three biological replicates per sample type, approximately 30 million sequence  
27 alignments per replicate, and four sample types: roots and shoots treated with exogenous  
28 cytokinin delivered hydroponically or a mock treatment. Cytokinin treatment triggered  
29 expression changes in thousands of genes but had negligible effect on splicing patterns.  
30 However, many genes were alternatively spliced between mock-treated roots and shoots,  
31 indicating that our methods were sufficiently sensitive to detect differential splicing in a data set.  
32 Quantitative fragment analysis of reverse transcriptase-PCR products made from newly prepared  
33 rice samples confirmed nine of ten differential splicing events between rice roots and shoots.  
34 Differential alternative splicing typically changed the relative abundance of splice variants that  
35 co-occurred in a data set. Analysis of a similar (but less deeply sequenced) RNA-Seq data set  
36 from *Arabidopsis* showed the same pattern. In both the *Arabidopsis* and rice RNA-Seq data sets,  
37 most genes annotated as alternatively spliced had small minor variant frequencies. Of splicing  
38 choices with abundant support for minor forms, most alternative splicing events were located  
39 within the protein-coding sequence and maintained the annotated reading frame. A tool for  
40 visualizing protein annotations in the context of genomic sequence (ProtAnnot) together with a  
41 genome browser (Integrated Genome Browser) were used to visualize and assess effects of  
42 differential splicing on gene function. In general, differentially spliced regions coincided with  
43 conserved regions in the encoded proteins, indicating that differential alternative splicing is  
44 likely to affect protein function between root and shoot tissue in rice.

45

46 **Key words:** rice, alternative splicing, cytokinin, root, shoot, RNA-Seq

47

48 **Abbreviations:** SR - Serine/Arginine, BA - benzyladenine, L - long, S - short, FDR - false  
49 discovery rate, PSI - percent spliced in, AS - acceptor site, DS - donor site, ES - exon skipping,  
50 RI - retained intron, ABA - abscisic acid, IGB - Integrated Genome Browser, CGE - capillary gel  
51 electrophoresis, RPKM - Reads Per Kilobase per Million mapped reads

## 52 INTRODUCTION

53 Differential splicing of pre-mRNA transcripts, called alternative splicing, enables one gene to  
54 produce multiple transcript variants encoding different functions. Alternative splicing is an  
55 almost universal phenomenon in higher eukaryotes, occurring to varying degrees in every animal  
56 and plant genome examined to date (Kalsotra and Cooper, 2011; Reddy *et al.*, 2013). In animals,  
57 differential expression of splice variants has been recruited as a regulatory mechanism in  
58 multiple processes, such as sex determination in invertebrates and neuronal differentiation in  
59 mammals (Kalsotra and Cooper, 2011; Salz, 2011; Barbosa-Morais *et al.*, 2012).

60 In plants, less is known about the functional significance and patterns of alternative splicing.  
61 However, several trends are apparent. Genes involved in circadian regulation are highly  
62 alternatively spliced, often producing multiple splice variants that fluctuate in concert with  
63 day/night cycling along with overall transcript abundance (Filichkin *et al.*, 2015b). The serine  
64 and arginine-rich (SR) family of RNA-binding, splicing regulatory proteins is greatly expanded  
65 compared to mammals and includes many plant-specific forms (Kalyna and Barta, 2004;  
66 Barbosa-Morais *et al.*, 2006; Plass *et al.*, 2008; Filichkin *et al.*, 2015a). SR transcripts  
67 themselves are also highly alternatively spliced in plants, with the relative abundance of these  
68 alternative transcripts varying according to environmental stresses and hormones (Palusa *et al.*,  
69 2007; Gullledge *et al.*, 2012; Filichkin *et al.*, 2015a; Keller *et al.*, 2016; Mei *et al.*, 2017).

70 A growing body of evidence indicates that cell and tissue specific regulation of alternative  
71 splicing occurs in plants, but its significance and extent is not well established (Vitulo *et al.*,  
72 2014; Li *et al.*, 2016a; Sun *et al.*, 2018). We previously found through analysis of RNA-Seq data  
73 from *Arabidopsis* pollen that the relative abundance of splice variants was similar between  
74 leaves and pollen, despite the differences between the two tissues (Lorraine *et al.*, 2013).  
75 However, this latter analysis was limited by having just one biological replicate for pollen and  
76 only two biological replicates for leaves. A more comprehensive analysis of multiple  
77 *Arabidopsis* data sets found a high incidence of isoform switching, in which the identity of the  
78 most prevalent variant differs between sample types (Vanechoutte *et al.*, 2017). However, this  
79 splicing diversity may have arisen in part from the heterogeneity of the data sets used, which  
80 were produced using rapidly changing (and improving) sequencing technologies at different  
81 times by different groups.

82 In this study, we used a well-replicated RNA-Seq data set from rice to re-examine prevalence  
83 of alternative splicing between tissues and hormone (cytokinin) treatment. This data set was  
84 previously generated to investigate cytokinin regulation of gene expression in roots and shoots  
85 from 10-day old rice seedlings (Raines *et al.*, 2016). A parallel study produced an analogous data  
86 set from *Arabidopsis* for comparison, but was less deeply sequenced (Zubo *et al.*, 2017). Both  
87 the rice and *Arabidopsis* RNA-Seq data sets included three biological replicates per sample type  
88 and four sample types – roots and shoots treated with exogenous cytokinin or a mock, vehicle-  
89 only treatment. In both data sets, the treatment triggered differential expression of thousands of  
90 genes, with roots affected to a greater degree than shoots.

91 For most alternatively spliced genes, regardless of whether or not they were differentially  
92 spliced, the relative abundance of splicing forms was highly skewed, with most alternatively  
93 spliced genes producing one major isoform. Nonetheless, there was a large minority of  
94 alternatively spliced genes where minor isoforms were more abundant and therefore seemed  
95 likely to affect gene function. We found that the relative abundance of splice variants for most  
96 alternatively spliced genes was remarkably stable, with very few differentially spliced genes  
97 between cytokinin treated and control samples. By contrast, many more genes were differentially  
98 spliced between roots and shoot, and most differential splicing occurred within the protein-  
99 coding sequence. Moreover, nearly every differential splicing event detected merely change the  
100 relative abundance of splice variants that co-occurred in the same sample. These results suggest  
101 differential alternative splicing likely contributes to gene function diversification between roots  
102 and shoots by moderating the relative abundance of splice co-expressed splice variants, but  
103 alternative splicing plays little role in cytokinin signaling.

104

## 105 **MATERIALS & METHODS**

106

### 107 **RNA-Seq library preparation and sequencing**

108 Rice and *Arabidopsis* samples were prepared and sequenced as described in (Raines *et al.*,  
109 2016; Zubo *et al.*, 2017). Rice seedlings (Nipponbare) were grown hydroponically for ten days in  
110 a growth chamber set to 14 hours light (28°C) and 8 hours of dark (23°C) with light intensity 700  
111 mmol m<sup>-2</sup> s<sup>-1</sup>. Around six to ten seedlings were grown in the same pot, in four pots. On the tenth  
112 day, culture media was replaced with new media containing 5 µM of the cytokinin

113 benzyladenine (BA) or 0.05 mN NaOH as a control. After 120 minutes, roots and shoots were  
114 harvested separately. Roots and shoots from treatment or control pots were pooled to form three  
115 replicates per treatment. RNA was extracted and used to synthesize twelve libraries from BA-  
116 treated and mock-treated roots and shoots. Libraries were sequenced on an Illumina HiSeq  
117 instrument for 100 cycles, yielding 100 base, single end reads. Sequence data are available from  
118 the Sequence Read Archive under accession SRP04905. Aligned, processed data are available  
119 from the Oct. 2011 rice genome assembly IgbQuickload directorie at  
120 [http://igbquickload.org/quickload/O\\_sativa\\_japonica\\_Oct\\_2011/](http://igbquickload.org/quickload/O_sativa_japonica_Oct_2011/).

121 *Arabidopsis* plants were grown vertically on 1× Murashige and Skoog agar with 1% sucrose  
122 for ten days under continuous illumination in a temperature-controlled growth chamber (Zubo *et*  
123 *al.*, 2017). BA was applied to ten-day-old plants by immersing seedlings in MS solution  
124 containing 5 μM BA dissolved using dimethyl sulfoxide (DMSO), or DMSO without BA as a  
125 control, and gently shaken for two hours. Plants were harvested, and shoots and roots were  
126 collected separately. Libraries were sequenced on an Illumina HiSeq 2000 instrument for 100x2  
127 cycles, yielding 100 base, paired end reads, to a depth of around 10 million sequenced fragments  
128 per library. Sequence data are available from the Sequence Read Archive under SRP049054 (rice  
129 data) and SRP059384 (*Arabidopsis* data). Aligned, processed data are available from the  
130 TAIR10 (June 2009) *Arabidopsis* genome assembly IgbQuickload directories at [http://lorainelab-](http://lorainelab-quickload.scidas.org/rnaseq/)  
131 [quickload.scidas.org/rnaseq/](http://lorainelab-quickload.scidas.org/rnaseq/).

132

### 133 **Data processing**

134 Rice sequences were aligned onto the *O. sativa japonica* genome assembly Os-Nipponbare-  
135 Reference-IRGSP-1.0 (Kawahara *et al.*, 2013) and *Arabidopsis* sequences were aligned onto the  
136 TAIR10 June 2009 release of the *Arabidopsis* genome (Lamesch *et al.*, 2012) using TopHat  
137 (Kim *et al.*, 2013) and BowTie2 (Langmead and Salzberg, 2012) with maximum intron size set  
138 to 5,000 bases. A command-line, Java program called “FindJunctions” was used to identify  
139 exon-exon junctions from gapped read alignments in the RNA-Seq data. FindJunctions produces  
140 BED format files containing junction features, and the score field of the BED file lists the  
141 number of read alignments that supported the junction. Only reads that aligned to a unique  
142 location in the genome were considered. Source code and compiled versions of FindJunctions are  
143 available from <https://bitbucket.org/lorainelab/findjunctions>.

144

## 145 **Identification of alternative splicing events and differential splicing**

146 To date, there have been two major releases of *O. sativa japonica* gene models: the MSU7  
147 gene set (Kawahara *et al.*, 2013) and the RAP-Db gene set (Sakai *et al.*, 2013). The two gene  
148 model sets contain mostly the same data, but the MSU7 gene models appear to be the most  
149 heavily used and annotated with Gene Ontology terms. For simplicity, and to take advantage of  
150 available functional annotations, we used the MSU7 annotations here. For analysis of  
151 *Arabidopsis* data, we used TAIR10 (Lamesch *et al.*, 2012) and Araport11 (Cheng *et al.*, 2017)  
152 gene models.

153 Annotated alternative splicing events and the number of reads supporting each alternative  
154 were identified using the exon-intron overlap method introduced in (English *et al.*, 2010) and  
155 further developed here for use with RNA-Seq data. Exons and introns from pairs of gene models  
156 from the same locus were compared to identify alternatively spliced regions. Regions where an  
157 intron in one model overlapped an exon in another model on the same strand were identified and  
158 used to define mutually exclusive splicing choices (Fig. 1). Gene models that included an  
159 alternatively spliced region were designated the “L” form (for “Long”) with respect to the  
160 splicing choice. Likewise, models that lacked an alternatively spliced region were designated “S”  
161 (for “Short”). Alternatively spliced regions were labeled according to the type of alternative  
162 splicing, as follows. Regions flanked by alternative donor sites were designated “DS” for  
163 alternative donor site. Regions flanked by alternative acceptor sites were labeled “AS” for  
164 alternative accceptor site. AS and DS events that coincided with exon skipping were labeled  
165 “AS/ES” and “DS/ES”. Alternatively spliced regions arising from introns that the spliceosome  
166 sometimes failed to excise were designated “RI” for retained intron.

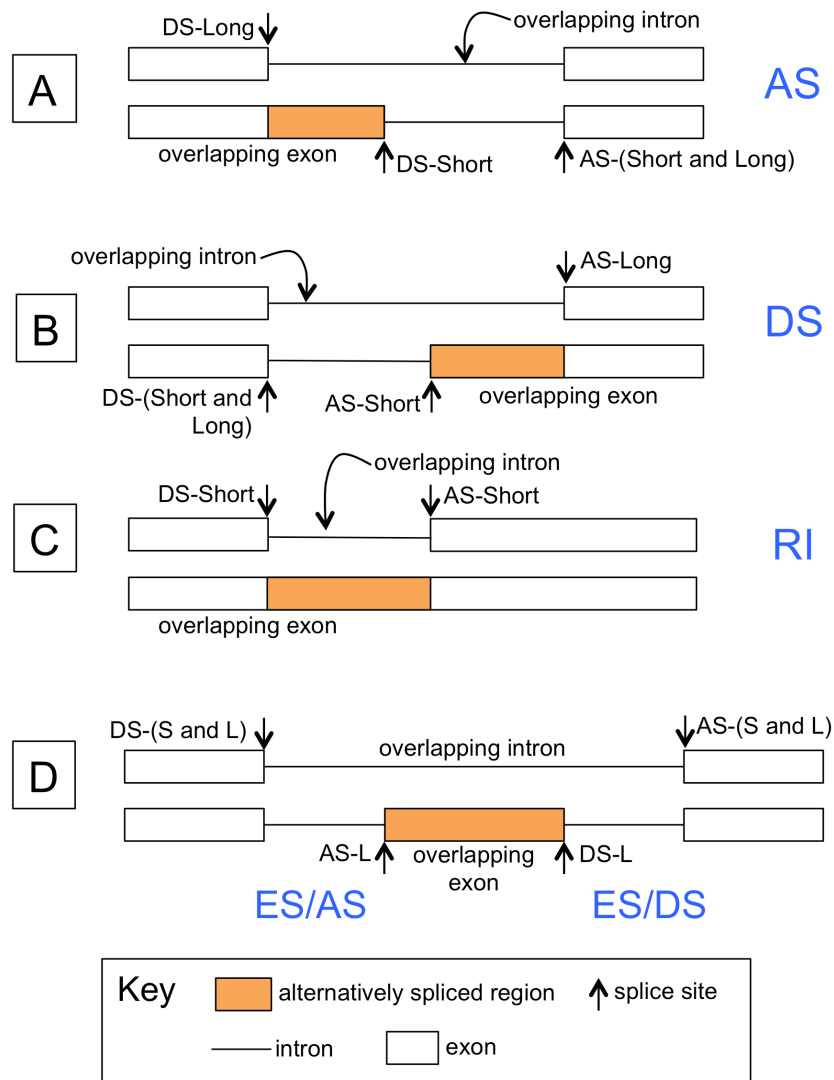

167

168 **Fig. 1. Alternative splicing annotation.** The overlap between an intron in one gene model and an exon  
 169 in another gene model defines an alternatively spliced region. Arrows indicate splice sites, named AS for  
 170 acceptor site and DS for donor site. Use of sites named AS-L or DS-L causes inclusion of the  
 171 differentially spliced region, generating the longer (L) isoform. Similarly, DS-S and AS-S refer to sites  
 172 that exclude the differentially spliced region and generate the shorter (S) isoform. (A) Alternative donor  
 173 sites, in which the U2 snRNP complex forms at alternative locations on the 5' end of introns. (B)  
 174 Alternative acceptor sites, in which the U1 snRNP complex forms at alternative sites near the 3' end of  
 175 alternatively spliced introns. (C) Alternatively spliced intron, in which a donor/acceptor site pairing can  
 176 either be used or not. used, forming a retained intron (RI). (D) Alternatively spliced, skipped exon. In  
 177 exon skipping, alternative splicing involves four sites, indicated by DS-S/L, AS-L, DS-L, and SD-S/L.  
 178 Exon inclusion requires assembly of two spliceosome complexes linking DS-S/L with AS-L and DS-L  
 179 with AS-S/L, while exon skipping requires linking DS-S/L and AS-S/L only.

180

181

182 For each alternatively spliced region representing two mutually exclusive splicing choices,  
183 RNA-Seq read alignments that unambiguously supported one or the other splicing choice were  
184 counted. For AS and DS events, only gapped reads that aligned across intron junctions were  
185 counted. For RI events, gapped reads that aligned across the retained intron were counted as  
186 support for the intron-removed (S) form, and un-gapped reads that overlapped at least 20 bases  
187 within the intron were counted as support for the intron-retained (L) form.

188 For each alternatively spliced region in each biological replicate, the number of reads  
189 supporting L or S, but not both, were used to calculate percent-spliced-in (PSI) as  $N/M*100$ ,  
190 where N was the number of reads supporting the L form and M was the number of reads that  
191 supported S or L but not both. This is the same as the splicing index described in (Katz *et al.*,  
192 2010). To identify differentially spliced regions, a two-sided t-test was used to compare PSI  
193 between sample types. Because PSI variance was large for events with small M (very few  
194 informative reads), only alternatively spliced regions where M was 10 or more in at least three  
195 replicate libraries were tested. A false discovery rate (FDR) was calculated for each test using the  
196 method of Benjamini and Hochberg (Benjamini and Hochberg, 1995), as implemented in the R  
197 programming language “p.adjust” method. Alternative splicing events with FDR less than or  
198 equal to 0.1 were considered differentially alternatively spliced.

199 Software used to identify and quantify alternative events is available from  
200 <https://bitbucket.org/lorainelab/altspliceanalysis>. Data analysis code used to analyze RNA-Seq  
201 data is available from <https://bitbucket.org/lorainelab/ricealtsplice>. Data analysis code is  
202 implemented as R Markdown files designed to be run in the RStudio development environment.  
203 Readers interested in experimenting with different analysis parameters can clone the repository,  
204 modify the code, and re-run analyses as desired. RNA-Seq alignments, coverage graphs, and  
205 junctions data are available for visualization in Integrated Genome Browser (Freese *et al.*, 2016).

206

## 207 **RT-PCR and capillary gel electrophoresis analysis of alternative splicing**

208 Differential alternative splicing detected by analysis of RNA-Seq was re-tested using the  
209 reverse transcriptase, PCR-based fragment analysis method described in (Stamm *et al.*, 2012).  
210 Differentially spliced regions identified computationally were PCR-amplified using fluorescently  
211 labeled primers and quantified using capillary gel electrophoresis. One benefit of the method is  
212 that the results are expressed as relative abundances of splice variants within a sample, thus



213 eliminating the need to normalize using reference genes as in traditional qRT-PCR experiments  
214 aimed at measuring overall gene expression.

215 For splicing validation, new rice seedlings equivalent to the mock-treated (control) samples  
216 from the RNA-Seq experiment were grown and harvested. Seedlings were grown hydroponically  
217 in pots containing either liquid media only or calcined clay granules watered with liquid media  
218 as recommended in (Eddy *et al.*, 2012). After twelve days, plants were removed from the pots  
219 and roots and shoots were collected separately. Roots and shoots from the same pot were  
220 combined to form paired biological replicates. Samples were flash frozen in nitrogen and stored  
221 at -80°C prior to RNA extraction.

222 RNA was extracted using the RNeasy Plant Mini Kit from Qiagen following the  
223 manufacturer's instructions. First strand cDNA was synthesized using oligo dT primers and 1 µg  
224 of total RNA per 20 µL reaction. PCR amplification of cDNA was performed using primers  
225 flanking differentially spliced regions, including one primer labeled with 6-carboxyfluorescein  
226 (6-FAM) for amplicon detection during fragment analysis. Cycle parameters included  
227 denaturation at 94°C for 2 minutes, followed by 24 cycles of 94°C for 15 sec, 50°C for 30 sec  
228 and 70°C for 1 min, with a final elongation step of 72°C for 10 minutes. This was essentially the  
229 same regime described in (Stamm *et al.*, 2012) but with fewer cycles to ensure reactions were  
230 stopped before exiting the logarithmic phase. PCR products were combined with size standards  
231 and separated on a 3730 Genetic Analyzer (Life Technologies). Amplicons were quantified using  
232 manufacturer-provided software by calculating the area under each amplicon peak. The  
233 percentage of the variant containing the alternatively spliced region (%L, see above) was  
234 calculated by dividing the long form area by the total area for both long and short forms.  
235 Spreadsheets with data exported from the instrument, along with PSI calculations, are available  
236 in the project git repository (<https://bitbucket.org/lorainelab/ricealtsplice>) in a subfolder named  
237 "Experimental Testing."

238

## 239 **RESULTS**

240

### 241 **Most genes annotated as alternatively spliced favored one dominant isoform**

242 Using the exon-intron overlap method described previously (English *et al.*, 2010) and Fig. 1,  
243 alternative splicing events within each gene were identified and annotated. Following annotation

244 of alternative splicing events, RNA-Seq read alignments from the rice and *Arabidopsis* libraries  
245 described in (Raines *et al.*, 2016; Zubo *et al.*, 2017) were used to assess alternative splicing in  
246 four sample types: roots and shoots from seedlings treated with the cytokinin compound  
247 benzyladenine (BA) or with a mock, control treatment. For each alternative splicing event, the  
248 number of sequence alignments unambiguously supporting each alternative was counted. These  
249 counts were used to calculate percent-spliced-in (PSI), the percentage of read alignments  
250 supporting the longer (L) isoform.

251 In the combined data from all libraries from the rice data set, 77% of AS events had at least  
252 one read supporting each of the two splicing choices, and 19.8% had support for just one splicing  
253 choice. Only 2.8% of AS events has no reads supporting either form; these corresponded to  
254 genes with low or no expression in any of the sample types tested. Most genes annotated as  
255 alternatively spliced had small minor variant frequencies, i.e., the less frequently observed forms  
256 were supported by fewer than 20% of informative RNA-Seq sequences (Fig. 2). Nevertheless,  
257 there was a large minority of alternative splicing events (around one third) where the minor, less-  
258 frequently observed form was more abundant and was supported by at least two out of ten  
259 informative alignments. These alternatively spliced regions correspond to the middle, trough-like  
260 region of Fig. 2.

261

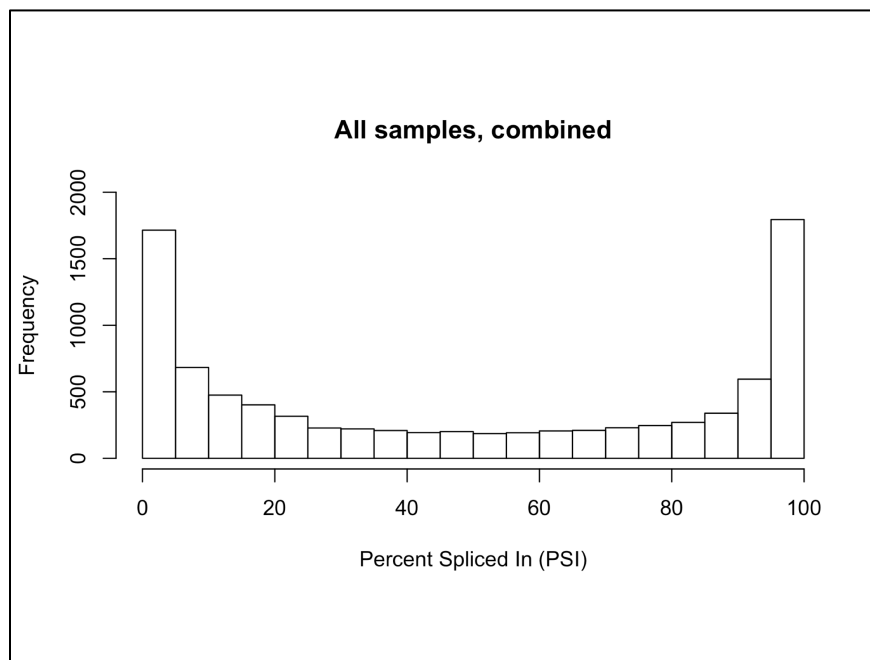

**Fig. 2.** Distribution of percent-spliced-in (PSI) for annotated splicing events in rice where each choice was supported by at least one RNA-Seq alignment. PSI was calculated as  $100 * L / (S + L)$ , where L and S were the number of reads that supported the splicing choice that included (L) or excluded (S) the differentially spliced region. Read alignment counts from all twelve libraries were combined to obtain a global view of alternative splicing occurrence in rice seedlings. The U-shaped character of the distribution persisted whether lower or higher thresholds of informative reads were used.

262

263 **Rice genes with abundant support for both alternative splicing choices perform many**  
264 **diverse functions**

265 We used Gene Ontology term enrichment to determine if the subset of genes in rice for  
266 which alternatively spliced forms were unusually abundant exhibited enrichment with specific  
267 functions or processes, e.g., circadian cycling, in which alternative splicing might play a  
268 prominent regulatory role. We asked if some Gene Ontology terms were significantly enriched  
269 with genes containing alternative splicing events in which the minor form frequency was  
270 between 20 and 50%, corresponding to the central trough region of Fig. 2. Interestingly, we  
271 found that these genes exhibited a diversity of gene functions, with no significant enrichment of  
272 functional categories. Thus, alternative splicing in which minor forms are highly prevalent  
273 appears to affect genes with many functions in rice.

274

275 **Many rice genes are differentially spliced between roots and shoots but cytokinin hormone**  
276 **application has minimal effect on splicing**

277 In animals, differential splicing between cell or tissue types contributes to cellular  
278 differentiation, especially in the nervous system (Naftelberg *et al.*, 2015). Less is known about  
279 the role of alternative splicing in regulating cellular differentiation and other processes in plants.  
280 Rice shoots and roots are profoundly different tissues, but our previous analysis of this same data  
281 set found that many of the same genes were expressed in both (Raines *et al.*, 2016). This raises  
282 the question of how these two different tissues are able to carry out their specialized roles, and  
283 suggest the hypothesis that differential splicing could enable differential functions in genes  
284 expressed in both tissues, as proposed in (Reddy *et al.*, 2013).

285 Analysis of the effects of cytokinin treatment on this same data set from rice identified many  
286 thousands of genes that were differentially expressed in response to cytokinin (Raines *et al.*,  
287 2016). However, little is known about the role of alternative splicing during cytokinin response,  
288 except for one study in *Arabidopsis* that reported a shift in splicing of SR protein genes  
289 following cytokinin hormone treatment (Palusa *et al.*, 2007). Therefore, we examined differential  
290 splicing in the rice RNA-Seq data set comparing root and shoot tissue with or without cytokinin.

291 First, we asked: When an alternatively spliced gene was expressed in two different sample  
292 types, was the relative abundance of splice variants the same or different? To address this, we  
293 examined correlation of PSI between roots and shoots or between BA-treated versus mock-

294 treated samples (Fig. 3). We found that PSI was similar between treated and untreated samples,  
295 as revealed by the tighter clustering of scatter plot points (Fig. 3A-B). This indicated that genes  
296 that were alternatively spliced in BA-treated samples were also alternatively spliced in the  
297 controls, and that the relative abundance of splice variants was similar. Thus, the cytokinin  
298 hormone treatment had minimal effect on splicing. By contrast, there were many genes where the  
299 relative abundance of splice variants was different between roots and shoots (Fig. 3C).  
300 Consistent with Fig. 3, statistical testing of PSI differences between sample types identified 90  
301 genes where PSI was significantly different between roots and shoots ( $FDR \leq 0.1$ ) but only four  
302 and two genes where PSI was different between cytokinin-treated samples and controls in roots  
303 and shoots, respectively (Supplementary Table S1). Thus, we observed limited but non-trivial  
304 levels of differential alternative splicing between roots and shoots but minimal differential  
305 alternative splicing between control and BA-treated samples.  
306

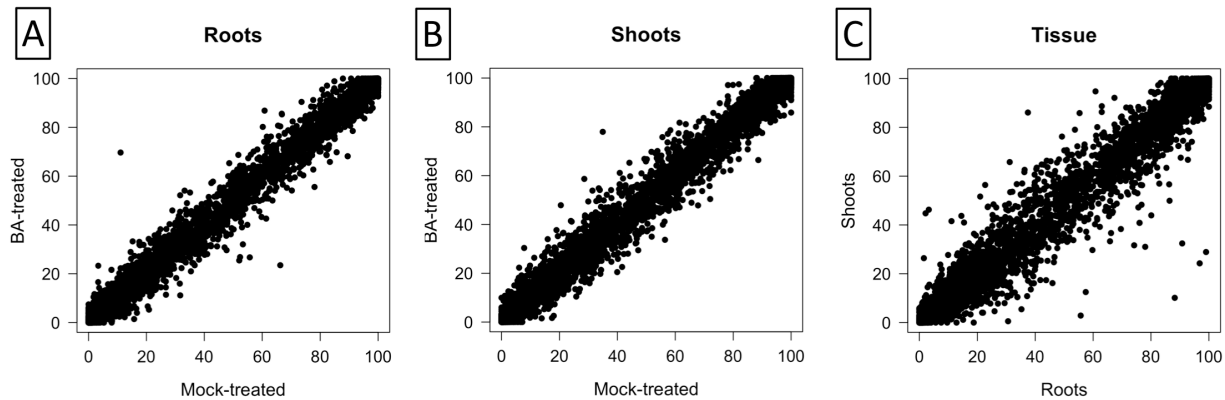

307 **Fig. 3.** Scatter plots comparing percent- spliced-in (PSI) between sample types in rice for annotated splicing events.  
308 PSI was calculated from RNA-Seq reads obtained from sequencing rice seedling shoots and roots grown  
309 hydroponically and subjected to a two-hour treatment with BA, a cytokinin analog, or a mock-treatment (control).  
310 PSI is the average of three biological replicates. Only events with at least 15 informative read alignments in all six  
311 samples being compared were included. (A) BA-treated rice roots (y axis) compared to mock roots (x axis). (B) BA-  
312 treated rice shoots (y axis) compared to mock shoots (x axis). (C) Mock shoots (y axis) compared to mock roots (x  
313 axis).

314

### 315 **Comparison of *Arabidopsis* differential splicing shows similar patterns to rice**

316 To determine whether the observed patterns of differential splicing are similar in other plants,  
317 we analyzed splicing in *Arabidopsis* roots and shoots that had also been treated with cytokinin  
318 (Zubo *et al.*, 2017). Due to the *Arabidopsis* libraries not being sequenced to the same depth as  
319 the rice libraries, many more splicing events had little or no support. Using the same FDR

320 threshold as with the rice data set ( $FDR \leq 0.1$ ), we identified few differentially spliced regions  
321 between shoots and roots (3) and none in the control to treatment comparisons (Supplementary  
322 Table S2). However, PSI was distributed similarly to rice in that most alternatively spliced genes  
323 expressed one major isoform (Supplementary Fig. S1A). In addition, scatter plots showing  
324 average PSI in treated versus untreated samples showed a much tighter clustering of points as  
325 compared to scatter plots comparing roots and shoots (Supplementary Fig. S1B-D). Statistical  
326 testing of PSI differences confirmed the cytokinin hormone treatment had minimal effect on  
327 splicing in *Arabidopsis*. Thus, the general pattern of more differential splicing between tissue  
328 types as compared to treatment with exogenous cytokinin appears conserved between rice and  
329 *Arabidopsis*.

330

### 331 **Alternative splicing remodeled protein-coding sequence more often than disrupting it in** 332 **rice**

333 Alternative splicing can occur anywhere in a gene, including UTR and protein-coding  
334 regions. Most differential splicing between roots and shoots (67%) occurred within protein-  
335 coding regions (Table 1 and Supplementary Table S1), suggesting that differential splicing is  
336 likely to affect gene function at the level of the protein product. In every instance of differential  
337 alternative splicing, major and minor isoforms were both detected, with differential splicing  
338 observed as a change in the relative abundance of the two forms.

339 Because three bases encode one amino acid, the lengths of spliced coding regions in a  
340 transcript are multiples of three. Thus, when alternatively spliced regions occur in coding regions  
341 and are not multiples of three, then inclusion of these regions in transcripts is likely to introduce  
342 a frame shift, resulting in a premature stop codon and a truncated protein product. As shown in  
343 Table 1, there was an enrichment of alternatively spliced regions in rice that were evenly  
344 divisible by three in coding regions versus non-coding in all subsets of the data. These subsets  
345 included all annotated alternatively spliced regions, regions where the minor form was unusually  
346 prevalent (the trough region of Fig. 2), and differentially spliced regions. Thus, alternative  
347 splicing within the coding regions of genes was biased against introducing frame shifts and  
348 promoted protein remodeling rather than truncation.

**Table 1.** Counts of alternative splicing choices in rice that produce difference regions evenly divisible by three or with remainder of 1 or 2.

| Alternative Splicing |                                    | Divisible | Remainder | Remainder | *P-value |
|----------------------|------------------------------------|-----------|-----------|-----------|----------|
| Location             | Event                              | by 3      | of 1      | of 2      |          |
| Coding region        | Annotated as alternatively spliced | 3,248     | 2,466     | 2,411     | 3e-36    |
| UTR                  | Annotated as alternatively spliced | 1,152     | 1,127     | 1,113     | 1        |
| Coding region        | Minor form is expressed            | 173       | 149       | 153       | 8e-6     |
| UTR                  | Minor form is expressed            | 34        | 20        | 13        | 0.03     |
| Coding region        | Differentially spliced             | 33        | 24        | 18        | 0.03     |
| UTR                  | Differentially spliced             | 6         | 5         | 11        | 0.79     |

\*P-value obtained from binomial test of the null hypothesis that the true probability of a differentially spliced region having a length divisible by three is 1 in 3 and an alternative hypothesis that the probability is greater than 1 in 3.

349

350 To further understand the effects of splicing on protein-coding sequences, we visualized  
 351 differentially spliced regions together with RNA-Seq alignments, coverage graphs, and inferred  
 352 junctions using genome browsers. Two genome browsers were used to visualize the data -  
 353 Integrated Genome Browser (Freese *et al.*, 2016) and ProtAnnot (Mall *et al.*, 2016). Integrated  
 354 Genome Browser (IGB) was used to examine RNA-Seq read alignments and compare  
 355 alignments to the annotated gene structures. ProtAnnot, an IGB App, was used to search the  
 356 InterPro database of conserved protein motifs to find out how (or if) splicing inferred from RNA-  
 357 Seq data was likely to affect gene function through remodeling of protein motifs as detected by  
 358 the InterProScan Web service (Finn *et al.*, 2017).

359 Of the 105 differentially spliced regions, 71 overlapped protein-coding sequence regions,  
 360 suggesting that in these cases, alternative splicing affected protein function. All but one (70/71)  
 361 of the differentially spliced regions embedded in coding regions overlapped a predicted  
 362 functional motif (e.g., a predicted transmembrane helix) or a region found by protein  
 363 classification systems (e.g., Pfam (Finn *et al.*, 2016) or PANTHER (Thomas *et al.*, 2003)) to be  
 364 conserved among members of the same protein family (Supplementary Table S1 and Fig. 4).

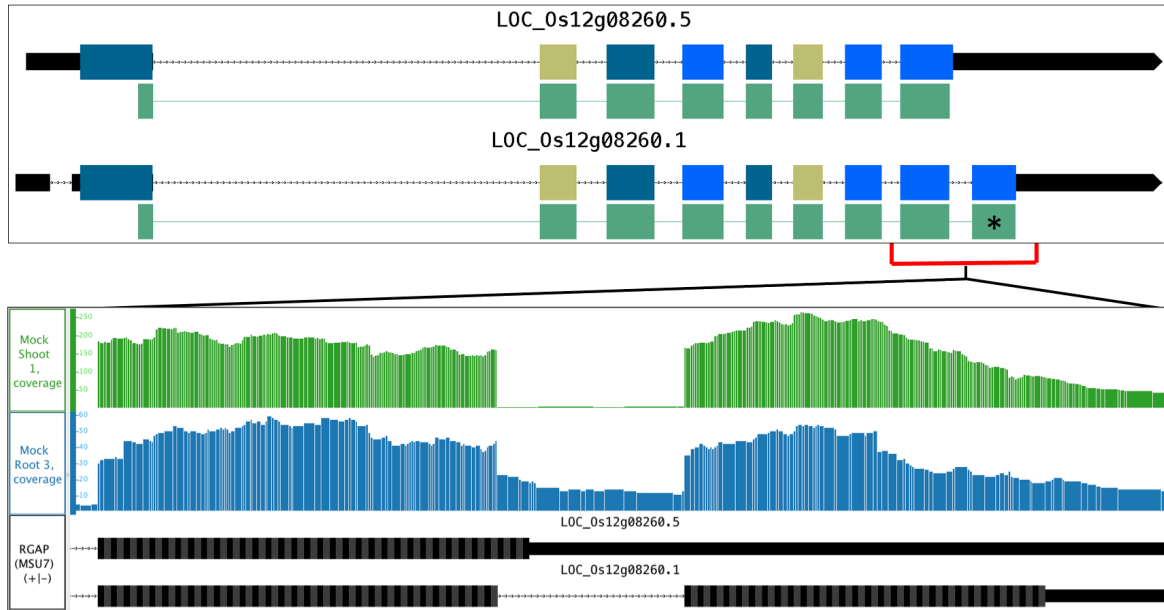

365 **Fig. 4.** ProtAnnot and IGB images showing difference in splicing between rice shoot and root. ProtAnnot  
366 (upper panel) shows coding region exons color-coded by frame, with regions matching InterPro profiles  
367 indicated by green, linked rectangles. Asterisk highlights difference in the PANTHER InterPro profile  
368 PTHR11516 between isoforms 1 and 5 of the LOC\_Os12g08260 gene. Integrated Genome Browser  
369 (lower panels) shows a zoomed-in view of RNA-Seq coverage graphs from rice root (blue) and shoot  
370 (green). Y-axis is the number of RNA-Seq aligned sequences with MSU7 gene models in black below.  
371

#### 372 **RT-PCR with capillary gel electrophoresis confirmed differential splicing between rice** 373 **roots and shoots for nine of ten genes tested**

374 We used a method based on capillary gel electrophoresis of fluorescently tagged PCR  
375 products to assay alternative splicing of ten genes detected as differentially spliced between rice  
376 roots and shoots (Stamm *et al.*, 2012). New rice seedlings were grown under a close-to-identical  
377 replication of the RNA-Seq experiment. Primers were designed to amplify differentially spliced  
378 regions, including one primer that was conjugated to a fluorescent tag. Following PCR  
379 amplification of cDNA prepared from the new rice samples, products were resolved on a  
380 capillary-based sequencer and PSI calculated (Table 2). In nine out of ten genes, differential  
381 alternative splicing was confirmed. In the one case where differential alternative splicing was not  
382 confirmed, there were very few RNA-Seq read alignments covering the differentially spliced  
383 region, suggesting this was likely a false positive result. The FDR cutoff used to detect  
384 differential splicing in the RNA-Seq data was 0.1, corresponding to one in ten false discoveries,  
385 in line with results from the microcapillary-based analysis.

386

**Table 2.** *Differential splicing detected using RNA-Seq and re-tested using capillary gel electrophoresis (CGE) in rice.*

| Gene                                             | AS type | Avg. RPKM Expression                         |       | RNA-Seq PSI (%L) |       | CGE PSI (%L) |       | *P-value |
|--------------------------------------------------|---------|----------------------------------------------|-------|------------------|-------|--------------|-------|----------|
|                                                  |         | Root                                         | Shoot | Root             | Shoot | Root         | Shoot |          |
|                                                  |         | LOC_Os01g25484, ferredoxin nitrite reductase | RI    | 300              | 131   | 74.2         | 31.7  |          |
| LOC_Os01g35580, unknown                          | AS      | 55.7                                         | 34.9  | 44.0             | 66.3  | 49.9         | 66.9  | 2.47e-04 |
| LOC_Os01g45274, carbonic anhydrase               | ES      | 171                                          | 1,380 | 96.8             | 24.3  | 97.4         | 15.4  | 3e-09    |
| LOC_Os01g51290, protein kinase                   | RI      | 49.6                                         | 49.9  | 88.4             | 95.1  | 13.3         | 17.2  | 0.03466  |
| LOC_Os03g05390, citrate transporter              | RI      | 219                                          | 174   | 86.0             | 96.3  | 86           | 95.5  | 1.2e-04  |
| LOC_Os12g08260, dehydrogenase E1                 | RI      | 8.03                                         | 30.3  | 55.7             | 2.9   | 4.1          | 0.87  | 3e-05    |
| LOC_Os01g61670, ureidoglycolate hydrolase        | DS      | 59                                           | 37.8  | 78.0             | 31.0  | 59           | 37.8  | 1.6e-09  |
| LOC_Os05g48040, MATE efflux family protein       | DS      | 7.05                                         | 6.72  | 88.1             | 100.0 | 89.4         | 88.27 | 0.632    |
| LOC_Os02g05830, ribulose biphosphate carboxylase | RI      | 4.79                                         | 12.3  | 88.2             | 10.1  | 23.9         | 3.06  | 8e-04    |
| LOC_Os06g05110, superoxide dismutase             | RI      | 12.5                                         | 39.7  | 38.5             | 13.6  | 22.7         | 6.5   | 1.3e-07  |

\*P-value obtained from comparing roots and shoots PSI from CGE.

387

388



## 389 **DISCUSSION**

390 This study profiled alternative splicing using a high coverage RNA-Seq data from 10-day  
391 old, hydroponically-grown rice seedlings treated with a cytokinin hormone. A less-deeply  
392 sequenced data set from similarly treated *Arabidopsis* seedlings provided comparison with  
393 another plant species. We found that cytokinin treatment induced very few splicing changes  
394 between treated and untreated controls. However, there were many differences in splicing  
395 between untreated roots and shoots, and most of these changed the protein coding region of  
396 genes.

397 Palusa et al. found that BA-treatment of *Arabidopsis* seedlings triggered splicing changes in  
398 multiple SR genes (Palusa *et al.*, 2007), encoding RNA-binding proteins whose counterparts in  
399 metazoans regulated alternative splice site choice. Their study used PCR amplification of cDNA  
400 followed by agarose gel electrophoresis to detect changes in splicing and focused on SR protein  
401 genes only. Thus, we expected to observe changes in SR gene splicing due to the cytokinin  
402 treatment, leading to changes in splicing for many downstream genes. However, no such  
403 differential splicing was apparent in either RNA-Seq data set tested. It is possible that the  
404 differences in methodology used to measure splicing changes between the two studies (RNA-Seq  
405 versus visualization of PCR amplification of cDNA) could account for the differences in  
406 observations. However, close examination of SR splicing genes in our dataset revealed no  
407 significant differences.

408 One possible explanation for why the cytokinin treatment had minimal effect on splicing was  
409 that the treatment itself was ineffective. However, differential expression analysis showed that  
410 many genes were up- or down- regulated by the treatment in the two data sets tested – rice and  
411 *Arabidopsis* (Raines *et al.*, 2016). Fewer genes were detected as differentially expressed in the  
412 *Arabidopsis* data set, most likely reflecting higher variability between biological replicates  
413 combined with lower sequencing depth as compared to the rice data set. Nevertheless, known  
414 cytokinin response genes were differentially regulated in both data sets, showing the cytokinin  
415 treatment penetrated plant cells and induced stereotypical cytokinin signaling without also  
416 triggering changes in splicing.

417 The relative lack of differential splicing between cytokinin-treated and mock-treated samples  
418 suggests that cytokinin signaling does not employ alternative splicing as a regulatory mechanism  
419 to the same degree as with other plant hormones, notably abscisic acid (ABA). ABA plays a role

420 in perception and response to stresses, especially desiccation stress (Maia *et al.*, 2014). ABA also  
421 plays a role in regulating splicing of SR45, an SR-like protein, and SR45 plays a role in  
422 regulating downstream splicing of multiple genes (Cruz *et al.*, 2014). Thus, there is a clear  
423 connection between stress signaling and the plant stress hormone ABA.

424 By contrast, cytokinin signaling involves transfer of phosphate groups between successive  
425 elements of a phosphorelay signaling pathway culminating in phosphorylation-dependent  
426 activation of Myb-type transcription factor proteins called type B ARRs. Cytokinin treatment has  
427 no or little effect on transcription of type B ARRs, the key regulators of cytokinin signaling  
428 (Argyros *et al.*, 2008; Kieber and Schaller, 2018). In addition, type B transcriptional regulators  
429 are not highly alternatively spliced. By contrast, a closely related family of similar genes  
430 encoding so-called “pseudo-response regulators” have similar sequence to type B ARRs and are  
431 highly alternatively spliced (James *et al.*, 2012). These genes are involved in regulating the  
432 circadian clock and have nothing to do with cytokinin signaling.

433 Using the same methods and data set, we identified a relatively large number of genes in rice  
434 (90) that were differentially spliced genes between shoots and roots, and we validated nine of ten  
435 using fragment analysis of independently produced rice samples. This observation of differential  
436 splicing between roots and shoots is important for two key reasons. First, it shows that our data  
437 analysis methods can identify differential alternative splicing in a data set. In other words, the  
438 roots versus shoots comparison provided a positive control for differential splicing detection.  
439 Second, the detection of differential splicing between roots and shoots illuminates the function of  
440 alternative splicing in plant cells. For most of the differentially spliced regions, both forms were  
441 present, and the difference in relative abundance between forms was often slight, rarely more  
442 than five or ten percent (Supplementary Table S1). Our data supports the growing body of  
443 evidence that alternative splicing is cell, tissue, and stage specific in plants (Vitulo *et al.*, 2014;  
444 Gupta *et al.*, 2015; Li *et al.*, 2016a; Sun *et al.*, 2018), including in roots (Li *et al.*, 2016b). It is  
445 likely that alternative splicing plays a role in fine-tuning gene function to meet the needs of  
446 different plant tissues or cell types where a gene is expressed.

447 We also examined the prevalence of alternative splicing, independent from differential  
448 splicing. That is, we used RNA-Seq read alignments to assess how often annotated alternative  
449 splice sites were used in our RNA-Seq data sets. For most genes annotated as alternatively  
450 spliced, the minor form frequency was typically low, accounting for less than 20% of sequence

451 read alignments across the differentially spliced region. Genes where minor form frequency  
452 exceeded 20% exhibited a diversity of functions. Thus, many diverse processes in rice involved  
453 alternatively spliced genes in which splice variants were expressed at levels likely to affect gene  
454 function in different ways.

455 A major limitation of this study was that we limited our analysis to annotated splice forms  
456 and did not attempt to form new transcript models based on the RNA-Seq data. This was done  
457 mainly because the libraries used were not strand-specific and attempts to assemble transcripts  
458 using transcript assembly tools led to incorrect fusion of neighboring genes and other artifacts  
459 (not shown). Future studies will therefore benefit greatly from using better library preparation  
460 protocols to simplify and streamline data analysis. Nonetheless, this analysis provides new  
461 insight into the role of alternative splicing in plant tissues and hormone response.

462 In conclusion, by analyzing the number of reads that supported different splice variants, we  
463 identified examples of differential splicing with confirmation by RT-PCR with capillary gel  
464 electrophoresis. There were 90 genes differentially spliced between rice root and shoot tissues,  
465 but only four between cytokinin-treated and non-treated samples. For most differential splicing  
466 events, the protein-coding regions were affected, strongly suggesting that differential splicing is  
467 playing a role in modulating gene function between roots and shoots.

468

469 **Supplementary Table S1.** Spreadsheet containing the rice mock root vs mock shoot, mock root  
470 vs treated root, and mock shoot vs treated shoot splicing data.

471

472 **Supplementary Table S2.** Spreadsheet containing the *Arabidopsis* mock root vs mock shoot  
473 splicing data.

474

## 475 **ACKNOWLEDGEMENTS**

476 This material is based upon work supported by the National Science Foundation through the  
477 Postdoctoral Research Fellowship in Biology under Grant No.1523814 awarded to NHF and the  
478 Plant Genome Research Program award number IOS-1238051. NIH award 2R01GM103463-  
479 06A1 to AEL supports development of the IGB software.

480

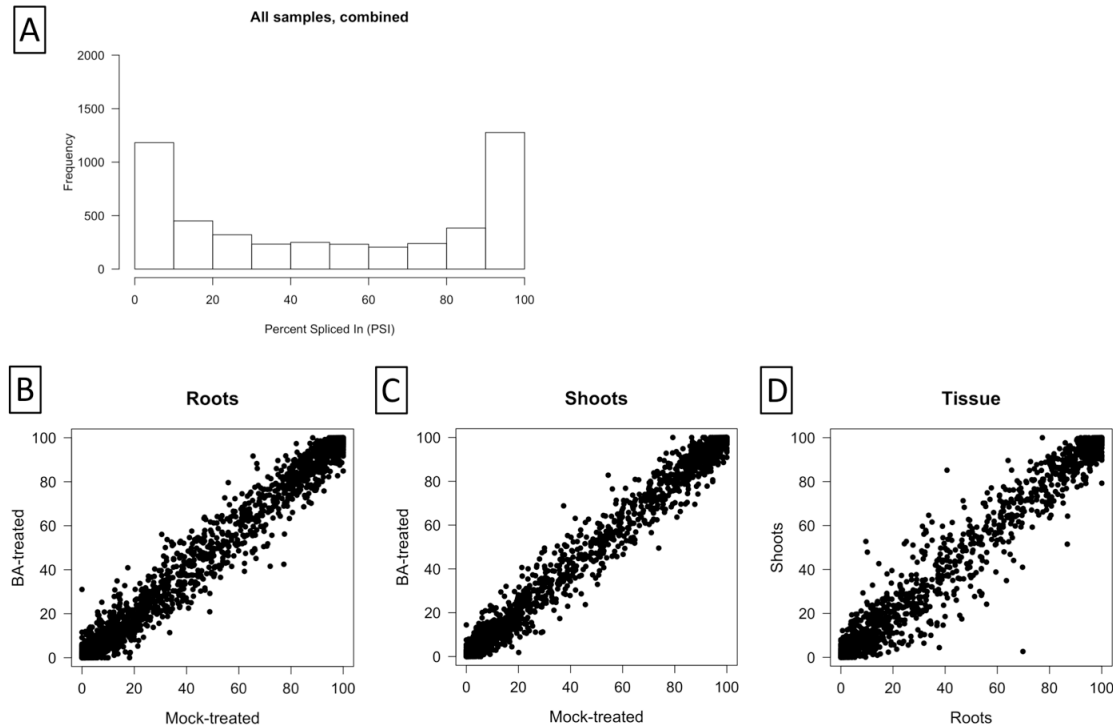

481 **Fig. S1. Percent-spliced-in (PSI) in *Arabidopsis* RNA-Seq data set between sample types for**  
482 **annotated splicing events.** (A) Counts of PSI events in all samples combined. PSI was calculated from  
483 RNA-Seq reads obtained from sequencing *Arabidopsis* seedling shoots and roots grown with or without  
484 BA, a cytokinin analog. PSI is the average of three biological replicates. Only events with at least 10  
485 informative read alignments in all six samples being compared were included. (B) BA-treated  
486 *Arabidopsis* roots (y axis) compared to mock roots (x axis). (C) BA-treated *Arabidopsis* shoots (y axis)  
487 compared to mock shoots (x axis). (D) Mock shoots (y axis) compared to mock roots (x axis).  
488

#### REFERENCES CITED

- Argyros RD, Mathews DE, Chiang Y-H, Palmer CM, Thibault DM, Etheridge N, Argyros DA, Mason MG, Kieber JJ, Schaller GE. 2008. Type B Response Regulators of *Arabidopsis* Play Key Roles in Cytokinin Signaling and Plant Development. *The Plant Cell* **20**, 2102-2116.
- Barbosa-Morais NL, Carmo-Fonseca M, Aparício S. 2006. Systematic genome-wide annotation of spliceosomal proteins reveals differential gene family expansion. *Genome Research* **16**, 66-77.
- Barbosa-Morais NL, Irimia M, Pan Q, Xiong HY, Guerousov S, Lee LJ, Slobodeniuc V, Kutter C, Watt S, Colak R, Kim T, Misquitta-Ali CM, Wilson MD, Kim PM, Odom DT, Frey BJ, Blencowe BJ. 2012. The evolutionary landscape of alternative splicing in vertebrate species. *Science* **338**, 1587-1593.
- Benjamini Y, Hochberg Y. 1995. *Controlling The False Discovery Rate - A Practical And Powerful Approach To Multiple Testing*.

- Cheng CY, Krishnakumar V, Chan AP, Thibaud-Nissen F, Schobel S, Town CD.** 2017. Araport11: a complete reannotation of the *Arabidopsis thaliana* reference genome. *Plant J* **89**, 789-804.
- Cruz TM, Carvalho RF, Richardson DN, Duque P.** 2014. Abscisic acid (ABA) regulation of *Arabidopsis* SR protein gene expression. *Int J Mol Sci* **15**, 17541-17564.
- Eddy R, Hahn DT, Moulton T.** 2012. Optimizing Greenhouse Rice Production: What Is the Best Root Medium? *Purdue Methods for Rice Growth*.
- English AC, Patel KS, Loraine AE.** 2010. Prevalence of alternative splicing choices in *Arabidopsis thaliana*. *BMC Plant Biol* **10**, 102.
- Filichkin S, Priest HD, Megraw M, Mockler TC.** 2015a. Alternative splicing in plants: directing traffic at the crossroads of adaptation and environmental stress. *Curr Opin Plant Biol* **24**, 125-135.
- Filichkin Sergei A, Cumbie Jason S, Dharmawardhana P, Jaiswal P, Chang Jeff H, Palusa Saiprasad G, Reddy ASN, Megraw M, Mockler Todd C.** 2015b. Environmental Stresses Modulate Abundance and Timing of Alternatively Spliced Circadian Transcripts in *Arabidopsis*. *Molecular Plant* **8**, 207-227.
- Finn RD, Attwood TK, Babbitt PC, Bateman A, Bork P, Bridge AJ, Chang H-Y, Dosztányi Z, El-Gebali S, Fraser M, Gough J, Haft D, Holliday GL, Huang H, Huang X, Letunic I, Lopez R, Lu S, Marchler-Bauer A, Mi H, Mistry J, Natale DA, Necci M, Nuka G, Orengo CA, Park Y, Pesseat S, Piovesan D, Potter SC, Rawlings ND, Radaschi N, Richardson L, Rivoire C, Sangrador-Vegas A, Sigrist C, Sillitoe I, Smithers B, Squizzato S, Sutton G, Thanki N, Thomas PD, Tosatto Silvio C E, Wu CH, Xenarios I, Yeh L-S, Young S-Y, Mitchell AL.** 2017. InterPro in 2017—beyond protein family and domain annotations. *Nucleic Acids Research* **45**, D190-D199.
- Finn RD, Coggill P, Eberhardt RY, Eddy SR, Mistry J, Mitchell AL, Potter SC, Punta M, Qureshi M, Sangrador-Vegas A, Salazar GA, Tate J, Bateman A.** 2016. The Pfam protein families database: towards a more sustainable future. *Nucleic Acids Research* **44**, D279-D285.
- Freese NH, Norris DC, Loraine AE.** 2016. Integrated genome browser: visual analytics platform for genomics. *Bioinformatics* **32**, 2089-2095.
- Gulledge AA, Roberts AD, Vora H, Patel K, Loraine AE.** 2012. Mining *Arabidopsis thaliana* RNA-seq data with Integrated Genome Browser reveals stress-induced alternative splicing of the putative splicing regulator SR45a. *American journal of botany* **99**, 219-231.
- Gupta V, Estrada AD, Blakley I, Reid R, Patel K, Meyer MD, Andersen SU, Brown AF, Lila MA, Loraine AE.** 2015. RNA-Seq analysis and annotation of a draft blueberry genome assembly identifies candidate genes involved in fruit ripening, biosynthesis of bioactive compounds, and stage-specific alternative splicing. *Gigascience* **4**, 5.

- James AB, Syed NH, Bordage S, Marshall J, Nimmo GA, Jenkins GI, Herzyk P, Brown JW, Nimmo HG.** 2012. Alternative splicing mediates responses of the *Arabidopsis* circadian clock to temperature changes. *Plant Cell* **24**, 961-981.
- Kalsotra A, Cooper TA.** 2011. Functional consequences of developmentally regulated alternative splicing. *Nature Reviews. Genetics* **12**, 715-729.
- Kalyana M, Barta A.** 2004. A plethora of plant serine/arginine-rich proteins: redundancy or evolution of novel gene functions? *Biochemical Society transactions* **32**, 561-564.
- Katz Y, Wang ET, Airoidi EM, Burge CB.** 2010. Analysis and design of RNA sequencing experiments for identifying isoform regulation. *Nat Methods* **7**, 1009-1015.
- Kawahara Y, de la Bastide M, Hamilton JP, Kanamori H, McCombie WR, Ouyang S, Schwartz DC, Tanaka T, Wu J, Zhou S, Childs KL, Davidson RM, Lin H, Quesada-Ocampo L, Vaillancourt B, Sakai H, Lee SS, Kim J, Numa H, Itoh T, Buell CR, Matsumoto T.** 2013. Improvement of the *Oryza sativa* Nipponbare reference genome using next generation sequence and optical map data. *Rice* **6**, 1-10.
- Keller M, Hu Y, Mesihovic A, Fragkostefanakis S, Schleiff E, Simm S.** 2016. Alternative splicing in tomato pollen in response to heat stress. *DNA Research*, dsw051.
- Kieber JJ, Schaller GE.** 2018. Cytokinin signaling in plant development. *Development* **145**.
- Kim D, Pertea G, Trapnell C, Pimentel H, Kelley R, Salzberg SL.** 2013. TopHat2: accurate alignment of transcriptomes in the presence of insertions, deletions and gene fusions. *Genome Biol* **14**, R36.
- Lamesch P, Berardini TZ, Li D, Swarbreck D, Wilks C, Sasidharan R, Muller R, Dreher K, Alexander DL, Garcia-Hernandez M, Karthikeyan AS, Lee CH, Nelson WD, Ploetz L, Singh S, Wensel A, Huala E.** 2012. The Arabidopsis Information Resource (TAIR): improved gene annotation and new tools. *Nucleic Acids Research* **40**, D1202-D1210.
- Langmead B, Salzberg SL.** 2012. Fast gapped-read alignment with Bowtie 2. *Nat Methods* **9**, 357.
- Li S, Yamada M, Han X, Ohler U, Benfey PN.** 2016a. High resolution expression map of the *Arabidopsis* root reveals alternative splicing and lincRNA regulation. *Developmental cell* **39**, 508-522.
- Li S, Yamada M, Han X, Ohler U, Benfey PN.** 2016b. High-Resolution Expression Map of the Arabidopsis Root Reveals Alternative Splicing and lincRNA Regulation. *Dev Cell* **39**, 508-522.
- Loraine AE, McCormick S, Estrada A, Patel K, Qin P.** 2013. RNA-seq of *Arabidopsis* pollen uncovers novel transcription and alternative splicing. *Plant Physiol* **162**, 1092-1109.
- Maia J, Dekkers BJ, Dolle MJ, Ligterink W, Hilhorst HW.** 2014. Abscisic acid (ABA) sensitivity regulates desiccation tolerance in germinated *Arabidopsis* seeds. *New Phytol* **203**, 81-93.

- Mall T, Eckstein J, Norris D, Vora H, Freese NH, Loraine AE.** 2016. ProtAnnot: an App for Integrated Genome Browser to display how alternative splicing and transcription affect proteins. *Bioinformatics* **32**, 2499-2501.
- Mei W, Boatwright L, Feng G, Schnable JC, Barbazuk WB.** 2017. Evolutionarily Conserved Alternative Splicing Across Monocots. *Genetics* **207**, 465-480.
- Naftelberg S, Schor IE, Ast G, Kornblihtt AR.** 2015. Regulation of alternative splicing through coupling with transcription and chromatin structure. *Annual review of biochemistry* **84**, 165-198.
- Palusa SG, Ali GS, Reddy ASN.** 2007. Alternative splicing of pre-mRNAs of *Arabidopsis* serine/arginine-rich proteins: regulation by hormones and stresses. *The Plant Journal* **49**, 1091-1107.
- Plass M, Agirre E, Reyes D, Camara F, Eyras E.** 2008. Co-evolution of the branch site and SR proteins in eukaryotes. *Trends in Genetics* **24**, 590-594.
- Raines T, Blakley IC, Tsai Y-C, Worthen JM, Franco-Zorrilla JM, Solano R, Schaller GE, Loraine AE, Kieber JJ.** 2016. Characterization of the cytokinin-responsive transcriptome in rice. *BMC Plant Biology* **16**, 260.
- Reddy ASN, Marquez Y, Kalyna M, Barta A.** 2013. Complexity of the Alternative Splicing Landscape in Plants. *The Plant Cell* **25**, 3657-3683.
- Sakai H, Lee SS, Tanaka T, Numa H, Kim J, Kawahara Y, Wakimoto H, Yang CC, Iwamoto M, Abe T, Yamada Y, Muto A, Inokuchi H, Ikemura T, Matsumoto T, Sasaki T, Itoh T.** 2013. Rice Annotation Project Database (RAP-DB): an integrative and interactive database for rice genomics. *Plant Cell Physiol* **54**, e6.
- Salz HK.** 2011. Sex Determination in Insects: a binary decision based on alternative splicing. *Current opinion in genetics & development* **21**, 395-400.
- Stamm S, Smith C, Lührmann R.** 2012. *Alternative pre-mRNA Splicing: Theory and Protocols*: Wiley-Blackwell.
- Sun Y, Hou H, Song H, Lin K, Zhang Z, Hu J, Pang E.** 2018. The comparison of alternative splicing among the multiple tissues in cucumber. *BMC Plant Biology* **18**, 5.
- Thomas PD, Campbell MJ, Kejariwal A, Mi H, Karlak B, Daverman R, Diemer K, Muruganujan A, Narechania A.** 2003. PANTHER: A Library of Protein Families and Subfamilies Indexed by Function. *Genome Research* **13**, 2129-2141.
- Vanechoutte D, Estrada AR, Lin YC, Loraine AE, Vandepoele K.** 2017. Genome-wide characterization of differential transcript usage in *Arabidopsis thaliana*. *Plant J* **92**, 1218-1231.
- Vitulo N, Forcato C, Carpinelli EC, Telatin A, Campagna D, D'Angelo M, Zimbello R, Corso M, Vannozzi A, Bonghi C, Lucchin M, Valle G.** 2014. A deep survey of alternative splicing in grape

reveals changes in the splicing machinery related to tissue, stress condition and genotype. *BMC Plant Biology* **14**, 99-99.

**Zubo YO, Blakley IC, Yamburenko MV, Worthen JM, Street IH, Franco-Zorrilla JM, Zhang W, Hill K, Raines T, Solano R, Kieber JJ, Loraine AE, Schaller GE.** 2017. Cytokinin induces genome-wide binding of the type-B response regulator ARR10 to regulate growth and development in *Arabidopsis*. *Proceedings of the National Academy of Sciences of the United States of America* **114**, E5995-E6004.
